# Supplementary material for: Uner Tan Syndrome: History, Clinical Evaluations, Genetics, and the Dynamics of Human Quadrupedalism
Source: PubMed Central journal article supplement — Open Neurol J. 2010 Jul 16;4:78–89. doi: 10.2174/1874205X01004010078 (PMC3024602; doi:10.2174/1874205x01004010078), 2010-07-16
Supplement: TONEUJ-4-78_SD1.pdf [file TONEUJ-4-78_SD1.pdf]

## **SUPPORTIVE/SUPPLEMENTARY MATERIAL**

The following videos are included as supportive material. They show the locomotion of UTS patients.

### **Video 1**

A new variant of UTS: a four-year-old child (from family E) walking and running around, noticeably running on tiptoe during quadrupedal locomotion.

### **Video 2**

Twelve-year-old boy (from family F) with late childhood facultative quadrupedalism: ataxic upright locomotion, sitting, standing up, and running on all four extremities.

### **Video 3**

Patients walking on all four extremities: habitual, diagonal-sequence quadrupedal locomotion.

### **Video 4**

The fourth tripedal case: a 48-year-old man with a paralyzed leg, using tripedal locomotion.

### **Video 5**

A moving .gif available online at <http://deadrnancy.com/muybridge/index.html> shows the movement of the paralytic child shown in Fig. (2).
